**1 Regulating Soil Bacterial Diversity, Enzyme Activities and Community**

**2 Composition Using Residues from Golden Apple Snails**

3 Jiaxin Wang<sup>‡1</sup>, Xuening Lu<sup>‡1</sup>, Jiaen Zhang<sup>123\*</sup>, Guangchang Wei<sup>1</sup> and Yue Xiong<sup>1</sup>

4 <sup>1</sup>*Department of Ecology, College of Natural Resources and Environment, South*

5 *China Agricultural University, Wushan Road, Tianhe District, Guangzhou 510642,*

6 *P.R. China*

7 <sup>2</sup>*Guangdong Provincial Key Laboratory of Eco-Circular Agriculture, Guangzhou,*

8 *510642, P.R. China*

9 <sup>3</sup>*Guangdong Engineering Research Center for Modern Eco-agriculture and Circular*

10 *Agriculture, Guangzhou 510642, P.R. China*

---

<sup>‡</sup> These authors contributed equally to this work.

\* Corresponding author: [jeanzh@scau.edu.cn](mailto:jeanzh@scau.edu.cn).

# Abstract

Golden apple snails (GAS) have become a serious pest for agricultural production in Asia. A sustainable method for managing GAS is urgently needed, including potentially using them to produce commercial products. In this study, we evaluate the effects of GAS residues (shell and meat) on soil pH, bacterial diversity, enzyme activities, and other soil characteristics. Results showed that the amendment of GAS residues significantly elevated soil pH (to near-neutral), total organic carbon (TOC) (by 10-134%), NO<sub>3</sub>-N (by 46-912%), NH<sub>4</sub>-N (by 18-168%) and total nitrogen (TN) (by 12-132%). Bacterial diversity increased 13% at low levels of amendment and decreased 5% at high levels, because low-levels of GAS residues increased soil pH to near-neutral, while high-levels of amendment substantially increased soil nutrients and subsequently suppressed bacterial diversity. The dominant phyla of bacteria were: Proteobacteria (about 22%), Firmicutes (15-35%), Chloroflexi (12%-22%), Actinobacteria (8%-20%) Acidobacteria, Gemmatimonadetes, Cyanobacteria and Bacterioidetes. The amendment of GAS residues significantly increased the relative abundance of Firmicutes, Gemmatimonadetes, Bacterioidetes and Deinococcus-Thermus, but significantly decreased the relative abundance of Chloroflexi, Actinobacteria, Acidobacteria, Cyanobacteria and Planctomycetes. Our results suggest that GAS residues treatment induces a near-neutral and nutrient-rich soil. In this soil, soil pH may not be the best predictor of bacterial community composition or diversity; rather soil nutrients (*ie.*, NH<sub>4</sub>-N and NO<sub>3</sub>-N) and soil TOC showed stronger correlations with bacterial community composition. Overall, GAS

residues could replace lime for remediation of acidic and degraded soils, not only to remediate physical soil properties, but also microbial communities.

**Keywords:** bacterial diversity; enzyme activities; golden apple snail; soil nutrients; 16S rRNA

## **Importance**

The wide spreading golden apple snail (GAS) is a harmful pest to crop productions and could result in soil and air pollutions after death. In the previous study, we developed a biocontrol method: adding GAS residues to acidic soil to mitigate the living GAS invasion and spread, improve soil quality, and reduce soil and air pollution. However, the effects of GAS residues amendment on bacterial diversity and community still remain unclear. This study provided insights into bacterial diversity and community compositions to facilitate the evaluation of GAS residues application.

# 1 Introduction

Invasive golden apple snails (GAS) *Pomacea canaliculata* (Lamarck) have become a serious pest for agricultural production in Asia (1). A series of control methods have been developed (2, 3); the most widely used is chemical control by molluscicides (4), which, could harm environmental and human health (5). A better method for sustainable management is urgently needed, potentially by using them to produce commercial products.

Studies have reported that GAS contains abundant  $\text{CaCO}_3$  and proteins, and could be used as feed for livestock such as pigs and ducks (6). However, only small GAS can be eaten by ducks or pigs, because the hard shells of large adult GAS make them unpalatable. The  $\text{CaCO}_3$  in GAS can also neutralize acidic soils, similar to lime. However, lime tends to lead to soil compaction, Si and P deficiency, and reduced soil microbial biomass and diversity.

Anthropogenic N inputs to terrestrial ecosystems have increased three- to five-fold over the past century (7). High levels of N fertilization can drive soil acidification both directly and indirectly (8). J. H. Guo et al. (8) found that anthropogenic acidification driven by N fertilization is at least 10 to 100 times greater than that associated with acid rain. The application and deposition of N is expected to continue to increase (9).

To alleviate soil acidification and control the invasion of the GAS, we have proposed using powered residues from GAS to mitigate soil acidification (unpublished data). The application of GAS residues can significantly increase soil

pH and nitrate nitrogen ( $\text{NO}_3\text{-N}$ ) both at a high and low amendment levels, and can increase soil total organic carbon (TOC), total nitrogen (TN), ammonium nitrogen ( $\text{NH}_4\text{-N}$ ) and  $\text{NO}_3\text{-N}$  compared with controls and with liming, which has no significant effect on soil nutrients (unpublished data). Although our previous research has indicated that the addition of GAS residues could significantly increase soil microbial biomass and regulate microbial community structure, the mechanisms by which GAS residues regulate microbial community composition, relative abundance and diversity remain unknown.

Previous studies have proposed soil pH and N input as the main predictors of soil microbial diversity in soils (10-12). However, the responses of soil microbes to elevated N inputs and pH are inconsistent. Numerous studies have revealed that N addition led to significant reductions in soil microbial activity (13), diversity (14) and community composition (15) because of increases in C sequestration and/or decreased soil respiration rates (13). Some studies have suggested that neutral soils support greater bacterial diversity than do acidic soils (10, 11). However, some researchers have suggested the opposite—that forest soils with lower pH support greater microbial diversity than agricultural soils with higher pH values (16).

Soil extracellular enzymes play key roles in biological soil processes, specifically in the degradation of soil organic compounds and the mineralization and recycling of nutrients related to C, N, P and S (17). Environmental factors, including water (18), salinity (18), pollution (19), soil nutrients (20), temperature (21) and soil pH can affect the activities of extracellular enzymes directly or indirectly.

Here, we conducted a series of greenhouse experiments amending GAS residues and lime to acidic and degraded soils. We hypothesize that GAS residues and lime—both of which increase soil pH—may differ in their regulation of microbial community structure, diversity and microbial enzyme activities. The objectives of this study were: (1) to explore bacterial community composition and diversity in soils neutralized with powered GAS residues, (2) to determine key factors controlling the composition of bacterial communities, (3) and assess differences in bacterial communities in soils treated with GAS residues and soils treated with lime.

## **2 Materials and methods**

### *2.1 Testing materials*

Golden apple snails (GAS) were collected from the paddy fields at the Xin Tang (Ning Xi) Research and Educational Station of South China Agricultural University, which is located in Zengcheng City, Guangdong Province, China. The snails were washed and frozen at -40°C in a freezer for 24h. Then the dead snails were dried, grounded into powder and stored in a desiccator. A slightly acidic soil was also collected from the paddy fields with the pH levels ranging from 6.25 to 6.53. The soil predominately consists of medium (38%) and fine (22%) sand, silt (36%) and clay (4%) and has 16.38 g kg<sup>-1</sup> of TOC, 2.20 g kg<sup>-1</sup> of TN and 0.58 g kg<sup>-1</sup> of total phosphorus (TP).

### *2.2 Experimental design*

Experiments were conducted in a greenhouse on the campus of South China

Agricultural University. We implemented three treatments: (1) the control treatment with soil only (CK); (2) soil amended with GAS residues (*i.e.*, shell and meat) (SR); and (3) soil amended with lime (SL). Each treatment had six levels of amendment: 0.5, 1, 2.5, 25, 50, and 100 g kg<sup>-1</sup>. Amendments were homogenized with soil in each treatment and carefully packaged in a polyvinyl chloride (PVC) column with a diameter of 180 mm and a height of 260 mm. A filter paper was mounted at the bottom of the column to prevent loss of soil or GAS residues. A base plate was also placed at the bottom of the column to position the column. About 400 ml of deionized water (pH = 7.0±0.1) were sprayed to the column each week to prevent the column from drying. Each treatment was triplicated in this study. After 120 days incubation, the soil samples were collected and stored at 4 °C for about 4h.

### 2.3 Soil analysis

Soil samples were homogenized by hand and passed through a 2mm sieve to remove rocks, roots and organic residues, and then divided evenly into three subsamples. These three subsamples were treated as follows: the first subsamples were stored at room temperature (about 22 °C) for about 4h, the second subsamples were stored at 4 °C, and the third subsamples were stored at -20 °C for further analysis. The room temperature (first) subsamples were air dried, grounded and analyzed for soil pH, TOC, TN, available phosphorous (AP), ammonium nitrogen (NH<sub>4</sub>-N) and nitrate nitrogen (NO<sub>3</sub>-N). The second subsamples were analyzed for soil gravimetric moisture and extracellular enzyme activity. The third subsamples were freeze-dried and grounded into power and passed through a 0.25 mm sieve for high-throughput

sequencing analysis.

Soil pH was measured from fresh soil slurries (1 g of soil: 2.5 ml of deionized water) using a handheld multiparameter meter (SX-620, SAN XIN, China). Approximately 20 mg of each powdered sample was analyzed for TOC and TN using a C analyzer (TOC-VCSH, Shimadzu Corp., Kyoto, Japan). Concentrations of  $\text{NH}_4\text{-N}$  were analyzed using a UV-vis spectrophotometer at a wavelength of 420 nm (22). Concentrations of  $\text{NO}_3\text{-N}$  were determined using a UV-vis spectrophotometer applying double wavelength of 275 nm and 220 nm (22). Concentrations of AP were analyzed using the molybdenum-antimony anti-spectrophotometric method (23).

#### *2.4 Extracellular enzyme assay*

Soil enzyme activities, including  $\beta$ -1,4-glucosidase (BG), acid phosphatase (ACP),  $\beta$ -1,4-N-acetylglucosaminidase (NAG) and  $\beta$ -D-cellobiosidase (cellulose degradation; CB), were measured using fluorometry as described in C. W. Au - Bell et al. (24), with minor modifications. In brief, 1 g of soil was weighted and dissolved in a porcelain evaporating dish with 125 ml of acetate-acetate buffer solution and blended for 30 min on a magnetic stirrer (JB-3, Ronghua, Jianfsu) at 200 rpm. Soil buffer solution (200  $\mu\text{l}$ ) was sucked from the dish and injected into a deep-well plate (Labtide, Greystone Biosciences LLC, USA), and then 50  $\mu\text{l}$  each of buffer, substrate and 4-Methylumbelliferyl (MUB) was pipetted and injected into deep-well plates, representing a blank well, sample well and quench well, respectively. We used 200  $\mu\text{l}$  of buffer plus 50  $\mu\text{l}$  of substrate as the negative well and 200  $\mu\text{l}$  buffer plus 50  $\mu\text{l}$  of MUB as the reference standard well. Incubation was conducted in a constant



temperature incubator (RXZ, Dongqi, Ningbo, China) at 37 °C for 3 h. After incubation, the sample was centrifuged (Eppendorf, USA) at 2900 rpm for 3 min, and the supernate was pipetted and injected into a black flat-bottomed 96-well microplate for fluorescence determination in a microplate reader (SYNERGY H1, BioTek, USA) at the excitation wavelength of 365 nm and emission wavelength of 450 nm.

## 2.5 Bacterial community and diversity analysis

Bacterial community structure and diversity in soils were determined by 16S rRNA. Soil DNA was extracted with the E.Z.N.A.<sup>®</sup> soil DNA Kit (Omega Bio-tek, Norcross, GA, USA.) in accordance with manufacturer's instructions. The extracted DNA was quantified by spectrophotometry (Nanodrop 2000, Thermo Scientific, UAS) and stored at -20 °C. Polymerase chain reaction (PCR) was carried out using the universal primer set 338F (5'- ACTCCTACGGGAGGCAGCAG-3') and 806R (5'-GGACTACHVGGGTWTCTAAT-3') by thermocycler PCR system (GeneAmp 9700, ABI, USA). PCR was performed to amplify 1 µl of template DNA in a 20-µl reaction system containing 4 µl of 5 × FastPfu Buffer, 2 µl of 2.5 mM dNTPs, 0.8 µl of each primer (5 µM), 0.4 µl of FastPfu Polymerase and 10 ng of template DNA. Amplification was performed in triplicate as follows: 95 °C for 3 min; 27 cycles of 95 °C for 30 s, 30s for annealing at 55 °C, and 45s for elongation at 72 °C; and a final extension at 72 °C for 10 min. PCR reactions were performed in triplicate 20 µl mixture containing 4 µl of 5 × FastPfu Buffer, 2 µl of 2.5 mM dNTPs, 0.8 µl of each primer (5 µM), 0.4 µl of FastPfu Polymerase and 10 ng of template DNA. The resulting PCR products were extracted from a 2% agarose gel and further purified

using the AxyPrep DNA Gel Extraction Kit (Axygen Biosciences, Union City, CA, USA) and quantified using QuantiFluor™-ST (Promega, USA) according to the manufacturer's protocol. Purified amplicons were pooled in equimolar and paired-end sequenced ( $2 \times 300$ ) on an Illumina MiSeq platform (Illumina, San Diego, USA) according to the standard protocols by Majorbio Bio-Pharm Technology Co. Ltd. (Shanghai, China). Raw fastq files were demultiplexed, quality-filtered by Trimmomatic and merged by FLASH with the following criteria: (i) The reads were truncated at any site receiving an average quality score  $< 20$  over a 50 bp sliding window. (ii) Primers were exactly matched allowing 2 nucleotide mismatching, and reads containing ambiguous bases were removed. (iii) Sequences with overlaps longer than 10 bp were merged according to their overlap sequences. Operational taxonomic units (OTUs) were clustered with 97% similarity cutoff using UPARSE (version 7.1 <http://drive5.com/uparse/>) and chimeric sequences were identified and removed using UCHIME. The taxonomy of each 16S rRNA gene sequence was analyzed by RDP Classifier algorithm (<http://rdp.cme.msu.edu/>) against the Silva (SSU123) 16S rRNA database using confidence threshold of 70%.

## 2.6 Data analysis

Analysis of Variance (ANOVA) was performed using SPSS. Differences in microbial communities were tested using ANOSIM with 9,999 permutations. A non-metric multidimensional scaling (NMDS) ordination to illustrate the clustering of bacterial community composition variation was conducted using the Vegan software based on the Bray-Curtis distance of genus. We used spearman correlations to identify

significant relationships between soil parameters (involved in six amendment levels of GAS residues and five amendment levels of lime treatments) and the most abundant phyla and genera. To evaluate bacterial diversity in amended soils, Shannon index (25) was applied. To compare microbial communities and identify specialized communities in samples, we used the LEfSe tool (26). Statistical analysis was performed only from the phylum to the genus level to simplify the computation. Non-metric multidimensional scaling (NMDS) of soil bacteria community composition based on Bray-Curtis distances linear regression after amending with lime and GAS residues were conducted to explore the main factors affected soil bacterial community compositions.

### **3 Results and discussion**

#### *3.1 Amendment effects on soil properties*

Amendments of GAS residues and lime resulted in increased soil pH (Fig. 1a). The addition of 1.0-2.5 g kg<sup>-1</sup> GAS residue increased soil pH to neutral (7.0) and additional amendments further increasing pH. Even the smallest amendment of lime (0.5 g kg<sup>-1</sup>) changed soil pH sharply from acidic to light alkaline (pH > 7.8) (Fig. 1a). The effect of GAS residues on pH may have been mitigated by the decomposition of proteins (from the snail meat) into amino acids and glucose by soil microbes (27).

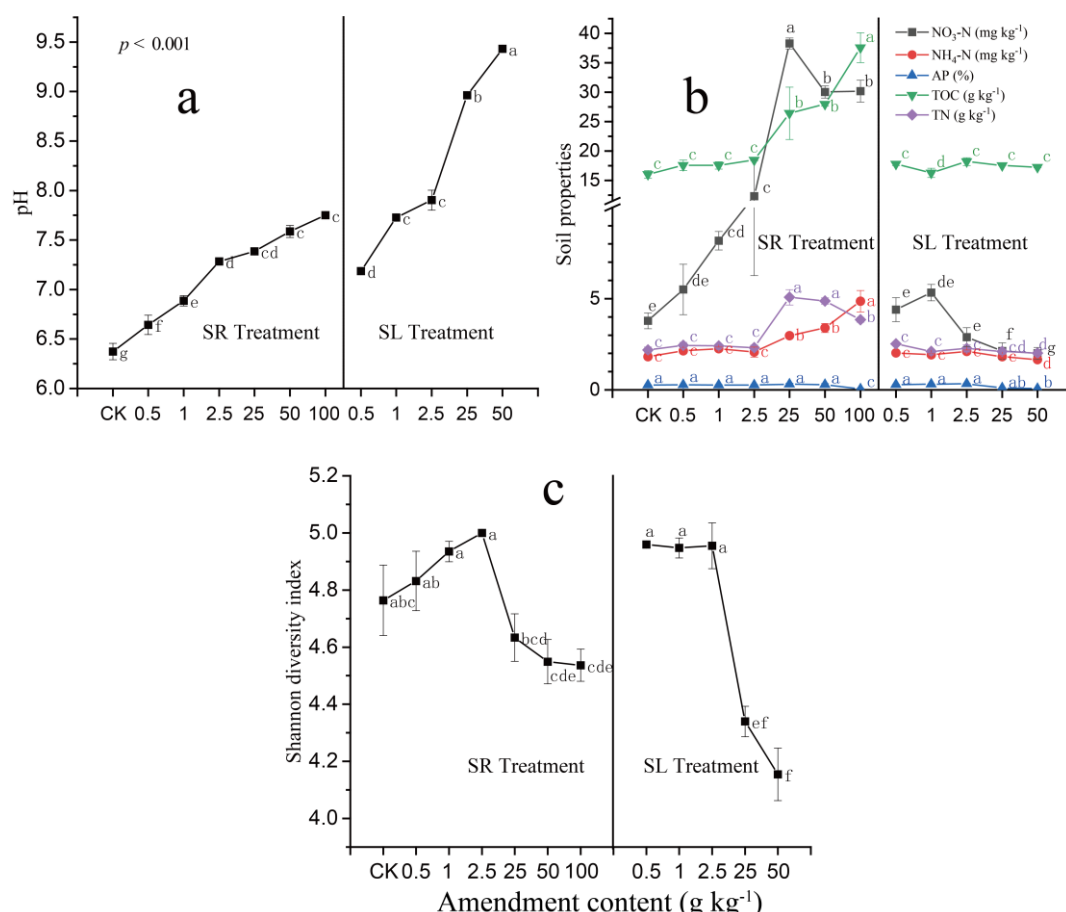

Fig. 1. Variations of Soil pH (a), TOC and nutrients (b), and (c) Shannon diversity index of bacterial induced by the amendment of GAS residues (SR) and lime (SL) in acid soil after incubated for 120 days; where soil properties were indicated by color lines, TOC (Total Organic Carbon, green), NO<sub>3</sub>-N (nitrite, black), TN, (Total Nitrogen, purple) NH<sub>4</sub>-N (ammonia, red) and AP (Available Phosphorus, blue) (n=3).

Addition of GAS residues also increased soil carbon and soil nutrients—specifically, TOC, TN, NO<sub>3</sub>-N and NH<sub>4</sub>-N (Fig. 1b). TOC and NH<sub>4</sub>-N progressively increased as more GAS residues were added, increasing by 134.28% (TOC) and 167.80 % (NH<sub>4</sub>-N) with the amendment of 100 g kg<sup>-1</sup> GAS residue. Soil nitrogen, TN and NO<sub>3</sub>-N showed peak values when 25 g kg<sup>-1</sup> GAS residues were

added, a threshold value prior to which proteins in the GAS residues decomposed or dispersed quickly, but after which anaerobic soils limited the activities of soil microbes and the transfer of proteins into small molecular and inorganic matter so that more NH<sub>4</sub>-N and NO<sub>x</sub> were produced and released into the air (27).

### *3.2 Amendment effects on bacterial diversity*

Soil pH and nutrients are the important factors that can affect the soil bacterial community and diversity indicated by Shannon index. Amendment of GAS residues and lime both significantly affected soil bacterial diversity (Fig. 1c). Specifically, amendment of up to 2.5 g kg<sup>-1</sup> GAS residues increased diversity, as measured by Shannon diversity index, from 4.76 (CK) to 4.99. The addition of more GAS residue decreased bacterial diversity; the addition 75 g kg<sup>-1</sup> GAS residues resulted in the lowest Shannon diversity index value (4.55) across treatments. Similar to GAS residue, the addition of lime had a positive effect on diversity, but had a negative effect when more than 2.5 g kg<sup>-1</sup> was added (Fig. 1c).

Previous studies have proposed that soil pH affects soil bacterial community structure and diversity (11, 28-30). N. Fierer and R. B. Jackson (10) found that the diversity and richness of soil bacterial communities differed by ecosystem type, and these differences could largely be explained by soil pH ( $r^2 = 0.70$  and  $r^2 = 0.58$ , respectively;  $P < 0.0001$  in both cases). Bacterial diversity was highest in neutral soils and lower in acidic soils, with soils from the Peruvian Amazon the most acidic and least diverse in their study (10). Our results were consistent with the observations reported in biochar amendment by Q. Li et al. (31), which found that bacterial

diversity was relatively low in alkaline soils. We found that soil bacterial diversity increased with the additions of GAS residues and lime amendments between 0.5-2.5 g kg<sup>-1</sup>, likely because of the shift from acidic to neutral soil pH. Bacterial diversity declined when more GAS residue or lime were added (more than 25 g kg<sup>-1</sup>), likely due to different factors. For the SL (lime) treatment, high soil pH likely restricted the growth and reproduction of soil bacteria. This is consistent with the results reported by J. Xiong et al. (32), in which soil pH was negatively correlated with soil bacterial diversity in alkaline lake sediments across the Tibetan Plateau. Nevertheless, for the SR (GAS residues) treatment, high soil nutrients, such as NO<sub>3</sub>-N and NH<sub>4</sub>-N, likely contributed to the simplification of bacterial diversity. These results were contrast to the previous work, in that the addition of N had no significant effect on bacterial diversity while elevated P could increase bacterial diversity marginally (33).

However, pH was not likely responsible for the decline of soil bacterial diversity in the SR (GAS residue) treatment, because the peak value of soil pH in the SR treatment was equal or less than 7.8, the pH that yielded maximum bacterial diversity in the SL treatment. Instead elevated soil nutrients likely caused declines in bacterial diversity in the SR treatment. Soil nutrient concentrations were significantly negatively correlated with bacterial diversity index (Table S1). For example, TOC, TN, NH<sub>4</sub>-N and NO<sub>3</sub>-N were all negatively correlated with Shannon ( $p < 0.05$ ) index. B. J. Campbell et al. (14) and A. Koyama et al. (34) reported similar negative relationships between bacterial diversity and N additions in Arctic tundra soils. Our results contrast, however, with other studies that show positive relationships between soil nutrients

and bacterial diversity (33), which could be caused by differences in the types of soil,  
and the types and amount of nutrients amended (10, 35, 36).

278 *3.3 Amendment effects on bacterial community composition*

Our assessment generated 2016767 high-quality 16S rRNA gene sequences. The bacterial community composition of the soil samples shifted significantly as a result of the amendment of GAS residues and lime, and were clearly distinguished (Fig. 2a, ANalysis Of SIMilarity (ANOSIM),  $R = 0.823$ ,  $P < 0.001$ ) among the different amendment treatments, and such a pattern was confirmed by hierarchical clustering based on genus (Fig. 2b). Specifically, the analysis identified three groups of bacterial community compositions (*i.e.*, in soils amended with high concentrations of lime, soils amended with high concentration of GAS residues and soils amended with low concentrations of lime or GAS residues). The reason contributed to these changes may attribute to elevated high soil pH and high nutrients availability induced by over amended lime and GAS residues.

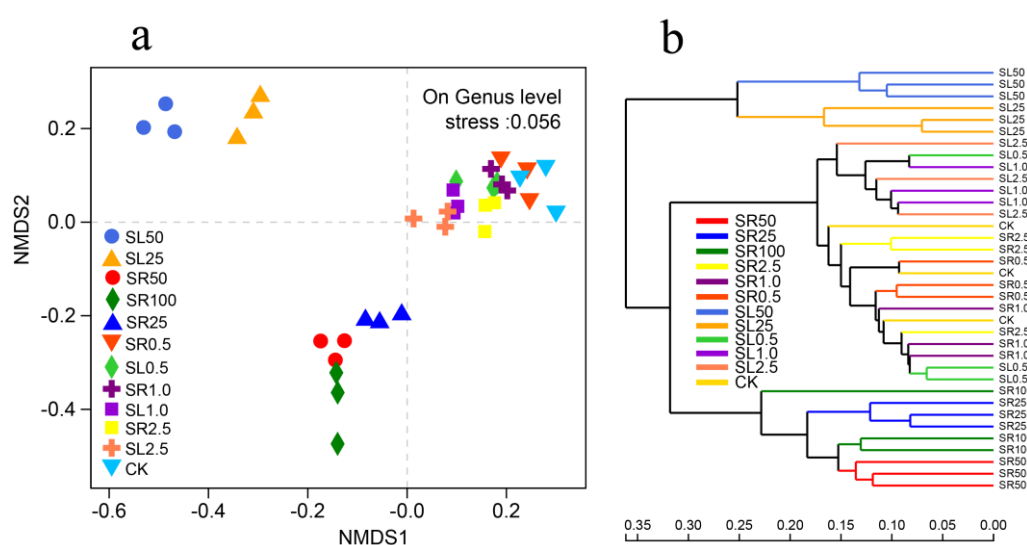

based on 16S rRNA within plots as affected amendments (a); and hierarchical clustering of treatments (b). SR represents GAS residues treatments, SL represents lime treatments and the numbers 0.5, 1, 2.5, 25, 50 and 100 represent the amendment levels ( $\text{g kg}^{-1}$ ), CK represents the control (n=3)

Amendment of GAS residues and lime induced different changes in bacterial community compositions. The most abundant bacterial phyla detected in soil samples were Proteobacteria (about 22%), Firmicutes (range from 15 -35%), Chloroflexi (range from 12% - 22%), Actinobacteria (range from 8% - 20%), Acidobacteria, Gemmatimonadetes, Cyanobacteria and Bacterioidetes (Fig. 3). The amendment of GAS residues significantly increased the relative abundance of Firmicutes, Gemmatimonadetes, Bacterioidetes and Deinococcus-Thermus, but significantly decreased the relative abundance of Chloroflexi, Actinobacteria, Acidobacteria, Cyanobacteria and Planctomycetes. In SL (lime) treatments, we detected similar decreases in the abundance of Chloroflexi, Acidobacteria and Planctomycetes, but in contrast to SR (GAS residue) treatments, the abundance of Cyanobacteria increased significantly (Fig. 3). Gemmatimonadetes and Bacterioidetes increased in relative abundance in SR treatments but not in SL treatments, possibly because Gemmatimonadetes and Bacterioidetes were responsible for the degradation of soil carbon and the emission of  $\text{CO}_2$  (37, 38). Amendment of GAS residues (especially high levels) increased soil TOC, which likely contributed to increases in relative abundance of Gemmatimonadetes and Bacterioidetes. Our results contrast with previous studies that found that high soil pH (with biochar addition) resulted in



decreases in Firmicutes abundance (39). That result may reflect the integrated effects of elevated soil pH, C and N (particularly N), because Firmicutes is involved in N cycling (40).

Significant changes of soil bacterial communities in SR (GAS residues) treatments can also be explained by copiotroph and oligotroph mechanisms driven by changes in soil nutrients. Copiotrophs preferentially consume labile soil organic C pools, have high nutritional requirements, and can exhibit high growth rates when resources are abundant. In contrast, oligotrophs exhibit slower growth rates and are likely to outcompete copiotrophs in conditions of low nutrient availability due to their higher substrate affinities (41). In our study, the amendments of GAS residues induced oligotrophic soil conditions that may have benefited copiotrophs and disadvantaged oligotrophs. Our results were similar to the previous studies, in that bacteria belonging to the Acidobacteria phylum were most abundant in soils with very low resource availability and their relative abundances declined in soils amended with high concentrations of organic C, N and P (33, 41).

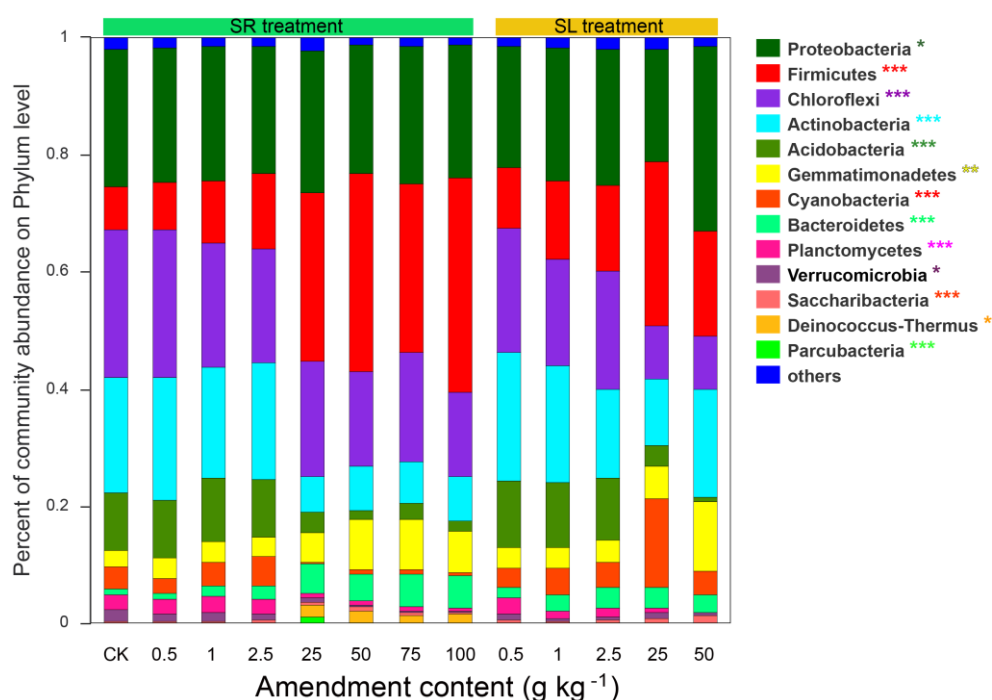

Fig. 3. 16S rRNA sequence-based microbial community composition of GAS residues (SR) and lime (SL) amended soils on the bacterial phylum level. Different colors indicate different phylum as showed in legend; and the symptoms \*, \* and \*\*\* represent significance at 0.05, 0.01 and 0.001 levels (n=3).

### 3.4 Correlations between soil properties and bacterial community composition

Our results indicated that soil properties were significantly correlated with bacterial phyla (Fig. 4a) and genera (Fig. S1a) in GAS residues amended soils. For example, pH, NH<sub>4</sub>-N, NO<sub>3</sub>-N and TN had significant positive correlations with the relative abundance of Gemmatimonadetes, Tenericutes, Chlorobi, Firmicutes, Bacteroidetes and Deinococcus-Thermus ( $p < 0.01$ ). In addition, significant negative correlations were detected with Antinobacteria, Cyanobacteria, Nitrospirae, Acidobacteria, Planctomycetes and Verrucomicrobia ( $p < 0.01$ ). As previously discussed, Gemmatimonadetes, Tenericutes, Chlorobi, Firmicutes, Bacteroidetes and Deinococcus-Thermus are all involved in C and N cycling, and amendment of GAS

residues (especially at high concentrations) induced high levels of C and N. The negative effects of SR treatment on Actinobacteria, Cyanobacteria, Nitrospirae, Acidobacteria, Planctomycetes and Verrucomicrobia may reflect sensitivities of some of these groups to higher soil pH; previous studies have found that some of these groups decrease in abundance after fertilizers are applied. For instance, D. R. Nemergut et al. (37) reported that the relative abundance of Verrucomicrobia declined in a fertilized soil. R. T. Jones et al. (42) reported that the abundance of Acidobacteria relative to other bacterial taxa was highly variable across soils, but correlated strongly and negatively with soil pH. B. J. Baker et al. (43) and N. Xu et al. (44) reported that Nitrospirae was active in nitrogen cycling, specifically as nitrite oxidation, and SR treatment may have increased labile nitrogen availability in the soil, possibly restricting growth of Nitrospirae. Although S. N. R. Prasanna (45) reported that Cyanobacteria prefer neutral to slightly alkaline pH for optimum growth, high nutrients may restrict its relative abundance.

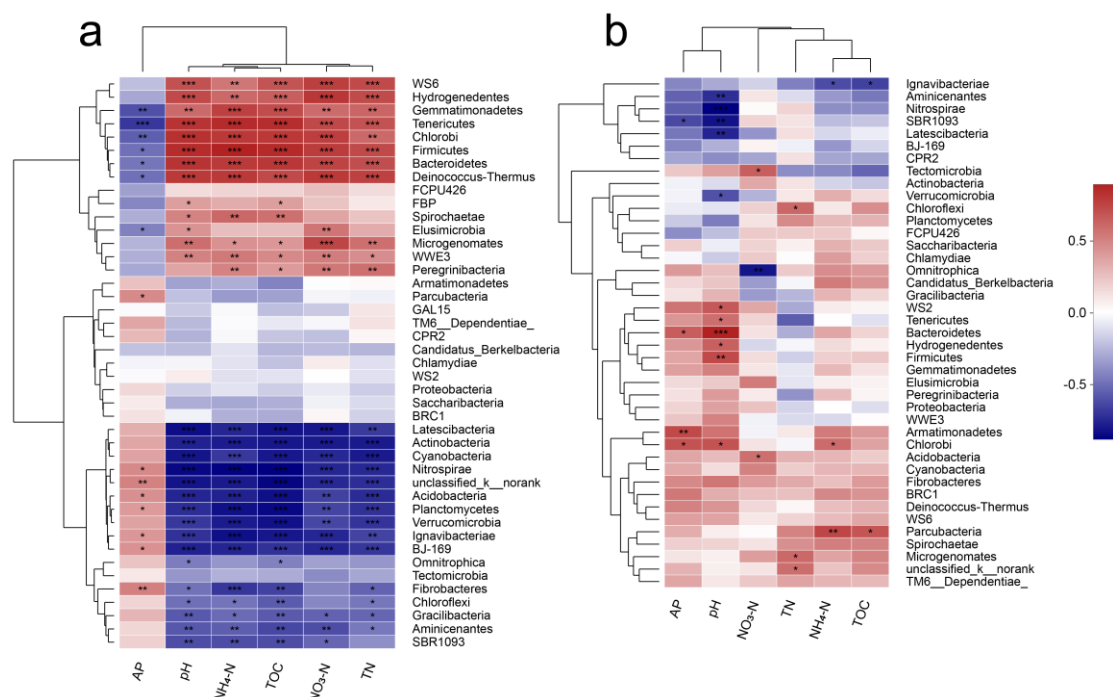

Fig. 4. Spearman correlations between soil properties and bacterial community composition on phylum level after amendment of GAS residues (a) and lime (b); where blue and red colors represent negative and positive correlations,; TOC represents total organic carbon, TN represents total nitrogen, N-NH<sub>4</sub><sup>+</sup> represents ammonia, N-NO<sub>3</sub><sup>-</sup> represents nitrite and AP represents available phosphorus, and the symptoms \*, \*\* and \*\*\* represent significant levels of 0.05, 0.01 and 0.001(n=3).

For the SR treatments, most significant correlations were found in soil pH; the only groups with relative abundance that was significantly positively related to pH were Bacteroidetes, Firmicutes and Chlorobi with soil pH (Fig. 4a). Fewer phyla showed significant correlations with soil nutrients in the SL treatments compared to the SR treatments. These results suggest that more phyla were affected by C, N (*ie.*, TOC, NH<sub>4</sub>-N, NO<sub>3</sub>-N and TN) in SR treatments. In SR treatments, which increased both soil pH and nutrient contents, soil pH does not appear to be a good predictor of bacterial community composition and diversity.

To evaluate the main factors driving changes in microbial communities in our experimental treatments, we used Non-metric multidimensional scaling (NMDS) of soil bacteria community composition based on Bray-Curtis distances linear regression (Fig. 5). In SL treatments, soil pH was the factor most strongly related to changes in bacterial community composition ( $R^2 = 0.90$ ) (Fig. 5a). However, in SR treatments soil nutrients tend to shape changes in bacteria composition (Fig. 5b). Our results are consistent with previous research that included a sub-set of the soils included in this survey; they found that the abundances of Bacteroidetes, Betaproteobacteria, and Acidobacteria were most strongly related to estimated carbon availability, not soil pH (41). In addition, soil nutrients (N and P) additions could significantly affect soil bacterial community compositions were also confirmed (33). Nevertheless, our results contrast with other studies that suggest pH as a strong predictor of bacterial community composition and diversity (11, 28, 46).

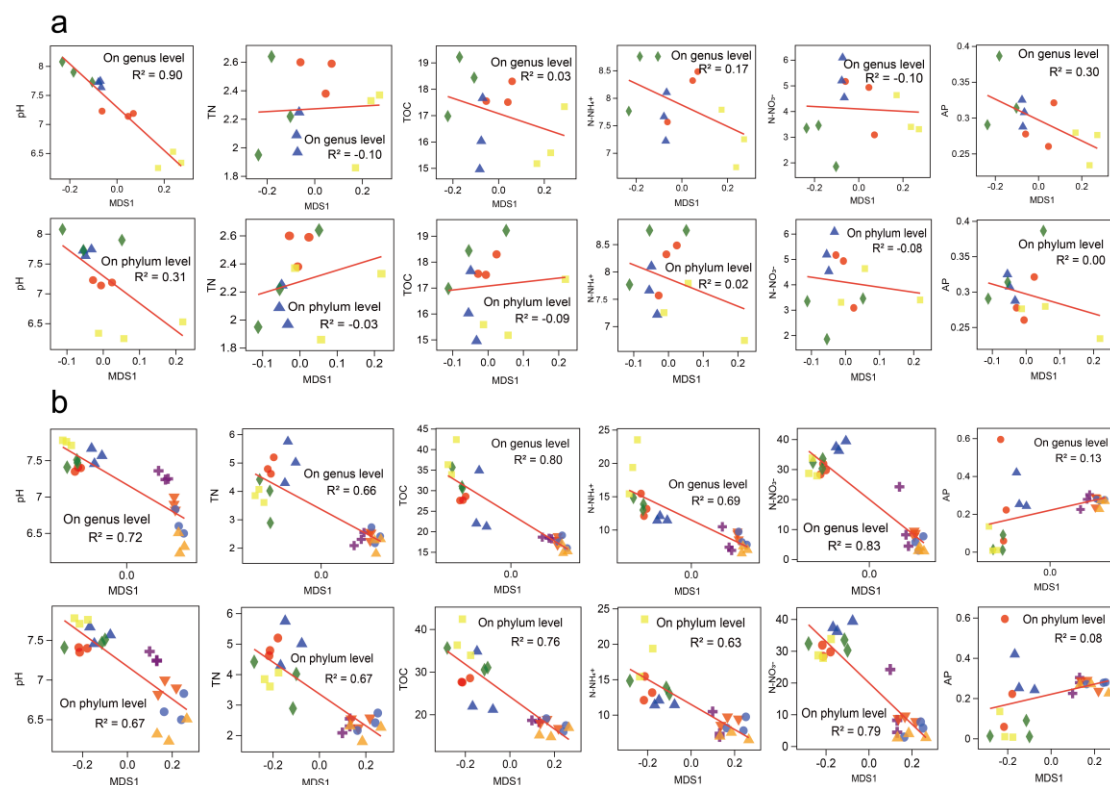

Fig. 5. Soil properties and Non-metric multidimensional scaling (NMDS) of soil bacteria community composition based on Bray-Curtis distances linear regression after amending with lime (a) and GAS residues (b); TOC represents total organic carbon, TN represents total nitrogen,  $\text{N-NH}_4^+$  represents ammonia,  $\text{N-NO}_3^-$  represents nitrite and AP represents available phosphorus (n=3).

Apart from determining diversity another primary goal of comparing microbial communities is to identify specialized communities in samples. Groups were shown in cladograms, and LDA scores of 2 or greater were confirmed by LefSe (Fig. S2). In GAS's residues treated soils, 21 bacteria phyla were enriched dominated with Actinobacteria, Bacteroidetes and Firmicutes followed by Acidobacteria, Cyanobacteria and other 16 phyla. Firmicutes were most abundant in the GAS residues 50 g  $\text{kg}^{-1}$  treatment, which may have been caused by the high soil pH; it was the same pH as in the lime 2.5 g  $\text{kg}^{-1}$  treatment. To evaluate the effects of amendments

on shaping microbial community composition, we compared results from high levels of the GAS residues amendments and low levels of lime amendments with results from low levels of GAS residues amendments, because high levels of GAS residues amendments and low levels of lime amendments showed similar effects on soil pH. The results showed that more specialized bacteria phyla were detected in soils treated with high levels of GAS residues amendments, which suggests that GAS residues can shape bacterial community compositions.

### *3.5 Correlations between enzyme activities and bacterial community composition*

Four enzymes related to C, N and P cycling in soil were determined to uncover the status of soil nutrients and C cycling after the amendment of both GAS residues and lime. We conducted Spearman Correlation analysis to identify the relationships between microbial communities and soil enzyme activities, and significant correlations were found in SR treatment (Fig. 6). For example, we found that  $\beta$ -D-cellobiosidase (CB),  $\beta$ -1,4-N-acetylglucosaminidase (NAG) and  $\beta$ -1,4-glucosidase (BG) activities were significantly correlated with microbial communities both on phylum (e.g., Bacteroidetes, Deinococcus-Thermus, Gemmatimonadetes, Actinobacteria, Acidobacteriae and Nitrospirae) level (Fig. 6a) and genus level (Fig. S3a) in soils treated with GAS residues amendment. Many fewer correlations were found in soils treated with lime amendment (Figs. 6b, S3b). The strong correlations in soils treated with GAS residues may be caused by its influence on substrate such as C and N. M. Waldrop et al. (47) reported that bacterial community composition was correlated with BG, ACP, and sulphatase activity, and concluded that enzyme activity

427 may provide a useful linkage between microbial community composition and carbon  
 428 processing. As Fig. 6a shows, significant and negative correlations between bacterial  
 429 phyla such as Actinobacteria, Acidobacteriae and Nitrospirae, and enzyme activities  
 430 such as CB NAG and BG. Previous studies suggested that N additions resulted in  
 431 significant reductions in soil microbial activity (13), diversity (14) and community  
 432 structure composition (15) because of increases in C sequestration and/or decreases in  
 433 soil respiration rates (13). However, in our study, enzyme activities significantly  
 434 increased after the addition of GAS residues, which contain abundant N in the form of  
 435 proteins and amino acids. It is possible that the elevated organic C and N induced by  
 436 GAS residues treatments promoted hydrolyzation but suppressed the mineralization  
 437 the C and N (48, 49). Our results are consistent with the results reported by M.  
 438 Carreiro et al. (50), who found that microbes responded to N by increasing cellulase  
 439 activity.



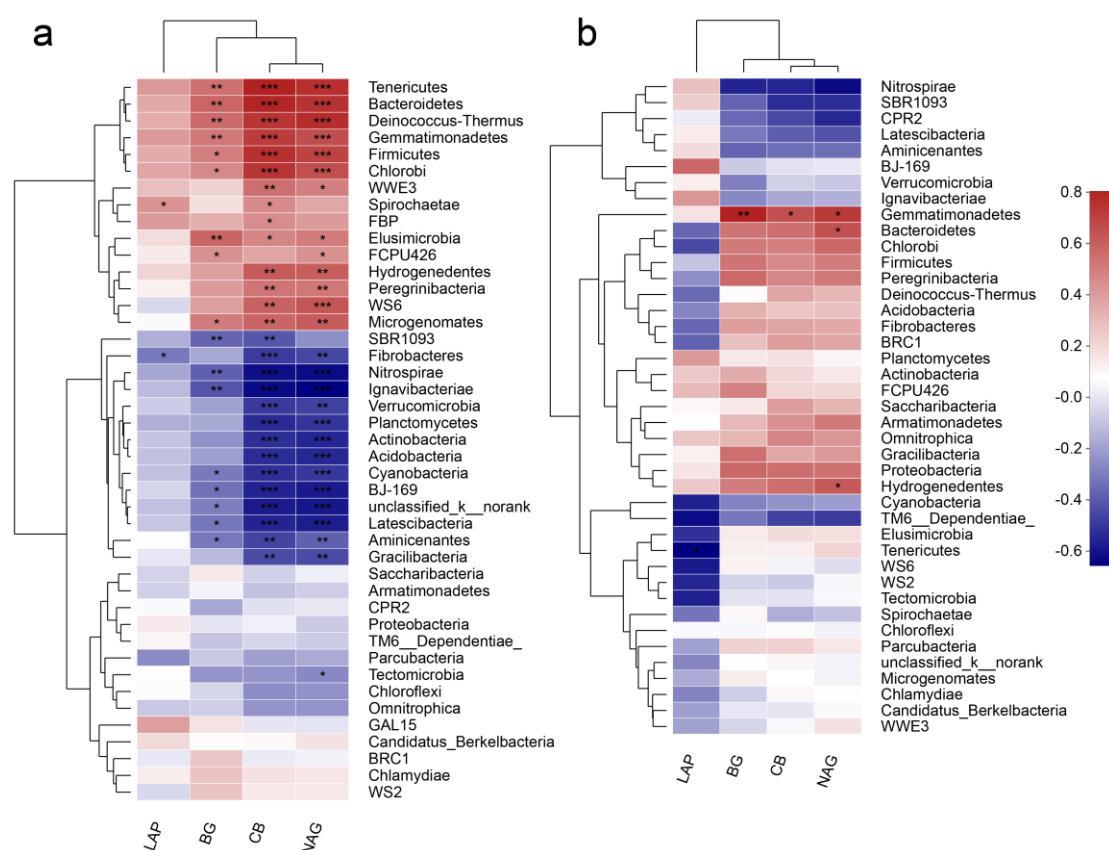

Fig. 6. Spearman correlations between soil enzyme activities and bacterial community composition on phylum level after amendment of GAS residues (SR) (a) and lime (SL) (b); where blue and red colors represent negative and positive correlations;  $\beta$ -1,4-glucosidase (BG), acid phosphatase (ACP),  $\beta$ -1,4-N-acetylglucosaminidase (NAG) and  $\beta$ -D-cellobiosidase (CB); the symptoms \*, \*\* and \*\*\* represent significant levels of 0.05, 0.01 and 0.001 (n=3).

Overall, in this study, the amendment of GAS residues significantly increased soil pH due to the  $\text{CaCO}_3$  component of the GAS's shell. However, GAS residues had weaker effects on soil pH than did lime treatments. For example, at the same amended levels, the pH of soils amended with lime increased sharply, while soils amended with GAS residues rose only to near-neutral pH. In addition, amendment of GAS residues

453 resulted in increased levels of soil nutrients, which could in turn lead to increased  
 454 bacterial diversity at low amendment levels and decreased bacterial diversity at high  
 455 amendment levels. That likely attribute to the amendment of GAS residues induced a  
 456 copiotrophic environment in which, the relative abundance of copiotrophic bacterial  
 457 communities were increased while oligotrophic bacterial communities were reduced.  
 458 What's more, soil pH also responsible for the changes of soil bacterial communities.  
 459 For instance, Gemmatimonadetes, Tenericutes, Chlorobi, Firmicutes, Bacteroidetes  
 460 and Deinococcus-Thermus were all increased with the addition of GAS residues.  
 461 Some of them such as Gemmatimonadetes, Tenericutes, Chlorobi and Bacteroidetes  
 462 were increased due to their roles in C and N cycling, while some of them were  
 463 decreased because they were suppressed at a higher pH environment. Most  
 464 researchers suggested that pH was the best predictor for bacterial diversity and  
 465 community compositions across different types of land-use. Nevertheless, in our study,  
 466 soil pH may not be the best predictor of bacterial community composition or diversity;  
 467 rather soil nutrients (*ie.*, NH<sub>4</sub>-N and NO<sub>3</sub>-N) and soil TOC showed stronger  
 468 correlations with bacterial communities. That likely because the amendment of GAS  
 469 residues induced elevated soil pH and nutrient content at the same time. Compared  
 470 with lime treatment, the amendment of GAS residues caused more enriched bacterial  
 471 phyla, that likely due to the soil nutrients difference between GAS residues treatment  
 472 and lime treatment. Considering the nutrients cycling, soil enzymes activities related  
 473 to C, N and P were determined and analyzed, our results suggested that soil enzymes  
 474 activities showed similar correlations to bacterial communities with soil nutrients.

Those indicated that the increases in enzymes activities were attributed to the elevation of soil nutrients induced by the amendment of GAS residues.

#### **4 Conclusion**

Our study proposed that GAS residues may be appropriate to remediate acidic soil, improve soil quality and reduce GAS populations in areas subject to GAS invasion. In practice, it may not be practical to dry and crush GAS into powder before applying it to soils. Instead, practitioners could create GAS residues at lower costs by collecting living or dead GAS, spreading them on the soil surface and smashing them using high speed rotary tiller. Also, we suggest applying GAS residues to nonirrigated farmland to reduce the potential water pollution. We suggest amending GAS at 2.5 – 25 g kg<sup>-1</sup>, which appears to be better for soil health and bacterial diversity. These recommendations warrant further testing in the field, but results of our greenhouse experiments suggest they hold promise.

#### **Acknowledgement**

This work was supported by the National Natural Science Foundation of China (No. U1701236, 31870525, 41871034), Guangdong Modern Agricultural Technology Innovation Team Construction Project (No. 2018LM1100) and Guangdong Provincial Key Laboratory of Eco-Circular Agriculture (No. 2019B030301007). We would like to thank Dr. Abe Miller-Rushing for his assistance with English language and grammatical editing of the manuscript.

## References

1. Chiu Y-W, Wu J-P, Hsieh T-C, Liang S-H, Chen C-M, Huang D-J. 2014. Alterations of biochemical indicators in hepatopancreas of the golden apple snail, *Pomacea canaliculata*, from paddy fields in Taiwan. *Journal of environmental biology* 35:667-673.
2. Dong S, Zheng G, Yu X, Fu C. 2012. Biological control of golden apple snail, *Pomacea canaliculata* by Chinese soft-shelled turtle, *Pelodiscus sinensis* in the wild rice, *Zizania latifolia* field. *Scientia Agricola* 69:142-146.
3. Guo J, Zhang J-e, Zhao B, Luo M, Zhang C. 2016. The role of spotted green pufferfish *Tetraodon nigroviridis* in controlling golden apple snail *Pomacea canaliculata*: an effective biological control approach involving a new agent. *Biocontrol Science and Technology* 26:1100-1112.
4. Olivier HM, Jenkins JA, Berhow M, Carter J. 2016. A pilot study testing a natural and a synthetic molluscicide for controlling invasive apple snails (*Pomacea maculata*). *Bulletin of environmental contamination and toxicology* 96:289-294.
5. Litsinger J, Estano DB. 1993. Management of the golden apple snail *Pomacea canaliculata* (Lamarck) in rice. *Crop Protection* 12:363-370.
6. Serra A. 1997. The use of golden snail *Pomacea Sp.* as animal feed in the Philippines. *Tropicultura* 15:40-43.
7. Galloway JN, Townsend AR, Erismann JW, Bekunda M, Cai Z, Freney JR, Martinelli LA, Seitzinger SP, Sutton MA. 2008. Transformation of the

519 nitrogen cycle: recent trends, questions, and potential solutions. *Science*  
520 320:889-892.

521 8. Guo JH, Liu XJ, Zhang Y, Shen JL, Han WX, Zhang WF, Christie P, Goulding  
522 KWT, Vitousek PM, Zhang FS. 2010. Significant Acidification in Major  
523 Chinese Croplands. *Science* 327:1008-1010.

524 9. Zhao Y, Duan L, Xing J, Larssen T, Nielsen CP, Hao J. 2009. Soil  
525 Acidification in China: Is Controlling SO<sub>2</sub> Emissions Enough? *Environmental*  
526 *Science & Technology* 43:8021-8026.

527 10. Fierer N, Jackson RB. 2006. The diversity and biogeography of soil bacterial  
528 communities. *Proceedings of the National Academy of Sciences* 103:626-631.

529 11. Rousk J, Bååth E, Brookes PC, Lauber CL, Lozupone C, Caporaso JG, Knight  
530 R, Fierer N. 2010. Soil bacterial and fungal communities across a pH gradient  
531 in an arable soil. *The ISME journal* 4:1340-1351.

532 12. Lauber CL, Strickland MS, Bradford MA, Fierer N. 2008. The influence of  
533 soil properties on the structure of bacterial and fungal communities across  
534 land-use types. *Soil Biology and Biochemistry* 40:2407-2415.

535 13. Ramirez KS, Craine JM, Fierer N. 2012. Consistent effects of nitrogen  
536 amendments on soil microbial communities and processes across biomes.  
537 *Global Change Biology* 18:1918-1927.

538 14. Campbell BJ, Polson SW, Hanson TE, Mack MC, Schuur EA. 2010. The  
539 effect of nutrient deposition on bacterial communities in Arctic tundra soil.  
540 *Environmental microbiology* 12:1842-1854.

- 541 15. Yu H, Ling N, Wang T, Zhu C, Wang Y, Wang S, Gao Q. 2019. Responses of  
542 soil biological traits and bacterial communities to nitrogen fertilization  
543 mediate maize yields across three soil types. *Soil and Tillage Research*  
544 185:61-69.
- 545 16. Roesch LFW, Fulthorpe RR, Riva A, Casella G, Hadwin AKM, Kent AD,  
546 Daroub SH, Camargo FAO, Farmerie WG, Triplett EW. 2007. Pyrosequencing  
547 enumerates and contrasts soil microbial diversity. *The Isme Journal* 1:283-290.
- 548 17. Baldrian P. 2009. Microbial enzyme-catalyzed processes in soils and their  
549 analysis. *Plant Soil Environ* 55:370-378.
- 550 18. Frankenberger W, Bingham F. 1982. Influence of Salinity on Soil Enzyme  
551 Activities 1. *Soil Science Society of America Journal* 46:1173-1177.
- 552 19. Wang Y, Shi J, Wang H, Lin Q, Chen X, Chen Y. 2007. The influence of soil  
553 heavy metals pollution on soil microbial biomass, enzyme activity, and  
554 community composition near a copper smelter. *Ecotoxicology and*  
555 *environmental safety* 67:75-81.
- 556 20. Camenzind T, Hättenschwiler S, Treseder KK, Lehmann A, Rillig MC. 2018.  
557 Nutrient limitation of soil microbial processes in tropical forests. *Ecological*  
558 *Monographs* 88:4-21.
- 559 21. Alvarez G, Shahzad T, Andanson L, Bahn M, Wallenstein MD, Fontaine S.  
560 2018. Catalytic power of enzymes decreases with temperature: New insights  
561 for understanding soil C cycling and microbial ecology under warming.  
562 *Global Change Biology* 24:4238-4250.

- 563 22. Dong L, Lin L, Li Q, Huang Z, Tang X, Wu M, Li C, Cao X, Scholz M. 2018.  
564 Enhanced nitrate-nitrogen removal by modified attapulgite-supported  
565 nanoscale zero-valent iron treating simulated groundwater. Journal of  
566 environmental management 213:151-158.
- 567 23. Bray RH, Kurtz L. 1945. Determination of total, organic, and available forms  
568 of phosphorus in soils. Soil science 59:39-46.
- 569 24. Au - Bell CW, Au - Fricks BE, Au - Rocca JD, Au - Steinweg JM, Au -  
570 McMahon SK, Au - Wallenstein MD. 2013. High-throughput Fluorometric  
571 Measurement of Potential Soil Extracellular Enzyme Activities. JoVE  
572 81:e50961.
- 573 25. Shannon CE. 1948. A mathematical theory of communication. Bell system  
574 technical journal 27:379-423.
- 575 26. Zhong Y, Yan W, Shanguan Z. 2015. Impact of long-term N additions upon  
576 coupling between soil microbial community structure and activity, and  
577 nutrient-use efficiencies. Soil Biology and Biochemistry 91:151-159.
- 578 27. Keenan SW, Schaeffer SM, Jin VL, DeBruyn JM. 2018. Mortality hotspots:  
579 nitrogen cycling in forest soils during vertebrate decomposition. Soil Biology  
580 and Biochemistry 121:165-176.
- 581 28. Lauber CL, Hamady M, Knight R, Fierer N. 2009. Pyrosequencing-based  
582 assessment of soil pH as a predictor of soil bacterial community structure at  
583 the continental scale. Appl Environ Microbiol 75:5111-5120.
- 584 29. Nicol GW, Leininger S, Schleper C, Prosser JI. 2008. The influence of soil pH

585 on the diversity, abundance and transcriptional activity of ammonia oxidizing  
586 archaea and bacteria. *Environmental microbiology* 10:2966-2978.

587 30. Delgado-Baquerizo M, Oliverio AM, Brewer TE, Benavent-González A,  
588 Eldridge DJ, Bardgett RD, Maestre FT, Singh BK, Fierer N. 2018. A global  
589 atlas of the dominant bacteria found in soil. *Science* 359:320-325.

590 31. Li Q, Lei Z, Song X, Zhang Z, Ying Y, Peng C. 2018. Biochar amendment  
591 decreases soil microbial biomass and increases bacterial diversity in Moso  
592 bamboo (*Phyllostachys edulis*) plantations under simulated nitrogen  
593 deposition. *Environmental Research Letters* 13:1-10.

594 32. Xiong J, Liu Y, Lin X, Zhang H, Zeng J, Hou J, Yang Y, Yao T, Knight R, Chu  
595 H. 2012. Geographic distance and pH drive bacterial distribution in alkaline  
596 lake sediments across Tibetan Plateau. *Environmental microbiology*  
597 14:2457-2466.

598 33. Leff JW, Jones SE, Prober SM, Barberán A, Borer ET, Firn JL, Harpole WS,  
599 Hobbie SE, Hofmockel KS, Knops JM. 2015. Consistent responses of soil  
600 microbial communities to elevated nutrient inputs in grasslands across the  
601 globe. *Proceedings of the National Academy of Sciences* 112:10967-10972.

602 34. Koyama A, Wallenstein MD, Simpson RT, Moore JC. 2014. Soil bacterial  
603 community composition altered by increased nutrient availability in Arctic  
604 tundra soils. *Frontiers in microbiology* 5:1-16.

605 35. Gomez E, Ferreras L, Toresani S. 2006. Soil bacterial functional diversity as  
606 influenced by organic amendment application. *Bioresource Technology*



607 97:1484-1489.

608 36. Freitag TE, Chang L, Clegg CD, Prosser JI. 2005. Influence of inorganic  
609 nitrogen management regime on the diversity of nitrite-oxidizing bacteria in  
610 agricultural grassland soils. *Appl Environ Microbiol* 71:8323-8334.

611 37. Nemergut DR, Townsend AR, Sattin SR, Freeman KR, Fierer N, Neff JC,  
612 Bowman WD, Schadt CW, Weintraub MN, Schmidt SK. 2008. The effects of  
613 chronic nitrogen fertilization on alpine tundra soil microbial communities:  
614 implications for carbon and nitrogen cycling. *Environmental microbiology*  
615 10:3093-3105.

616 38. Zhang H, Sekiguchi Y, Hanada S, Hugenholtz P, Kim H, Kamagata Y,  
617 Nakamura K. 2003. *Gemmatimonas aurantiaca* gen. nov., sp. nov., a  
618 Gram-negative, aerobic, polyphosphate-accumulating micro-organism, the  
619 first cultured representative of the new bacterial phylum Gemmatimonadetes  
620 phyl. nov. *International journal of systematic and evolutionary microbiology*  
621 53:1155-1163.

622 39. Sheng Y, Zhu L. 2018. Biochar alters microbial community and carbon  
623 sequestration potential across different soil pH. *Science of The Total*  
624 *Environment* 622:1391-1399.

625 40. Cobo-Díaz JF, Fernández-González AJ, Villadas PJ, Robles AB, Toro N,  
626 Fernández-López M. 2015. Metagenomic assessment of the potential  
627 microbial nitrogen pathways in the rhizosphere of a Mediterranean forest after  
628 a wildfire. *Microbial ecology* 69:895-904.

629 41. Fierer N, Bradford MA, Jackson RB. 2007. Toward an ecological  
630 classification of soil bacteria. *Ecology* 88:1354-1364.

631 42. Jones RT, Robeson MS, Lauber CL, Hamady M, Knight R, Fierer N. 2009. A  
632 comprehensive survey of soil acidobacterial diversity using pyrosequencing  
633 and clone library analyses. *The ISME journal* 3:442-453.

634 43. Baker BJ, Sheik CS, Taylor CA, Jain S, Bhasi A, Cavalcoli JD, Dick GJ. 2013.  
635 Community transcriptomic assembly reveals microbes that contribute to  
636 deep-sea carbon and nitrogen cycling. *The ISME journal* 7:1962-1973.

637 44. Xu N, Tan G, Wang H, Gai X. 2016. Effect of biochar additions to soil on  
638 nitrogen leaching, microbial biomass and bacterial community structure.  
639 *European Journal of Soil Biology* 74:1-8.

640 45. Prasanna SNR. 2007. Soil pH and its role in cyanobacterial abundance and  
641 diversity in rice field soils. *Applied Ecology and Environmental Research*  
642 5:103-113.

643 46. Shen C, Xiong J, Zhang H, Feng Y, Lin X, Li X, Liang W, Chu H. 2013. Soil  
644 pH drives the spatial distribution of bacterial communities along elevation on  
645 Changbai Mountain. *Soil Biology and Biochemistry* 57:204-211.

646 47. Waldrop M, Balser T, Firestone M. 2000. Linking microbial community  
647 composition to function in a tropical soil. *Soil biology and biochemistry*  
648 32:1837-1846.

649 48. DeForest JL, Zak DR, Pregitzer KS, Burton AJ. 2004. Atmospheric nitrate  
650 deposition, microbial community composition, and enzyme activity in

651           northern hardwood forests. Soil Science Society of America Journal  
652           68:132-138.

653   49.   Keeler BL, Hobbie SE, Kellogg LE. 2009. Effects of long-term nitrogen  
654           addition on microbial enzyme activity in eight forested and grassland sites:  
655           implications for litter and soil organic matter decomposition. Ecosystems  
656           12:1-15.

657   50.   Carreiro M, Sinsabaugh R, Repert D, Parkhurst D. 2000. Microbial enzyme  
658           shifts explain litter decay responses to simulated nitrogen deposition. Ecology  
659           81:2359-2365.

660
